# Supplementary material for: Effects of a Web-Based Lifestyle Intervention on Physical Fitness and Health in Physically Inactive Adults: A Randomized Controlled Trial
Source: MDPI journal article supplement (doi:10.3390/healthcare11212847), 2023-10-29
Supplement: s1 [file s1]

**Table S1.** Descriptive statistics for physical activity behavior (Fitbit Charge 3™) (ITT analysis,  $n = 189$ ).

| Group                                           | t0<br>(0 months)    | t1<br>(3 months)    | t2<br>(9 months)    | t3<br>(15 months)   |
|-------------------------------------------------|---------------------|---------------------|---------------------|---------------------|
| Daily step count (steps/day)                    |                     |                     |                     |                     |
| Intervention                                    | 10,298.98 ± 3275.36 | 10,408.19 ± 2926.62 | 10,755.86 ± 2884.27 | 10,342.08 ± 2726.89 |
| Control                                         | 10,110.05 ± 2934.87 | 10,380.37 ± 3345.13 | 10,278.82 ± 3091.26 | 10,425.40 ± 3059.40 |
| Sedentary behavior (min/day)                    |                     |                     |                     |                     |
| Intervention                                    | 849.96 ± 203.63     | 807.93 ± 207.69     | 802.23 ± 178.30     | 831.00 ± 178.49     |
| Control                                         | 820.93 ± 172.93     | 808.71 ± 225.12     | 825.55 ± 176.66     | 792.49 ± 164.76     |
| Light intensity physical activity (min/week)    |                     |                     |                     |                     |
| Intervention                                    | 1928.94 ± 529.11    | 1976.09 ± 461.52    | 1964.52 ± 463.49    | 1907.21 ± 443.50    |
| Control                                         | 1857.32 ± 394.10    | 1959.54 ± 413.05    | 1862.30 ± 370.63    | 1886.68 ± 332.07    |
| Moderate intensity physical activity (min/week) |                     |                     |                     |                     |
| Intervention                                    | 162.93 ± 135.31     | 152.52 ± 76.30      | 157.70 ± 81.57      | 169.98 ± 91.68      |
| Control                                         | 174.50 ± 108.09     | 158.67 ± 86.47      | 171.39 ± 166.54     | 178.41 ± 121.56     |
| Vigorous intensity physical activity (min/week) |                     |                     |                     |                     |
| Intervention                                    | 179.44 ± 115.91     | 173.50 ± 85.94      | 190.22 ± 102.79     | 187.45 ± 71.59      |
| Control                                         | 204.04 ± 136.16     | 192.11 ± 151.15     | 207.65 ± 154.89     | 194.84 ± 129.13     |
| Total physical activity (min/week)              |                     |                     |                     |                     |
| Intervention                                    | 2276.06 ± 572.77    | 2315.62 ± 503.16    | 2315.72 ± 519.43    | 2259.61 ± 511.09    |
| Control                                         | 2229.46 ± 423.58    | 2311.92 ± 480.27    | 2247.68 ± 488.40    | 2257.68 ± 423.92    |

Data are presented as mean ± SD. Intervention:  $n = 104$ , control:  $n = 85$ . ITT: intention-to-treat.

**Table S2.** Effect sizes for physical activity behavior (Fitbit Charge 3™) (ITT analysis,  $n = 189$ ).

| Group                                           | t0-t1<br>(0-3 months) | t0-t2<br>(0-9 months) | t0-t3<br>(0-15 months) |
|-------------------------------------------------|-----------------------|-----------------------|------------------------|
| Daily step count (steps/day)                    |                       |                       |                        |
| Intervention                                    | 0.04 [-0.24, 0.31]    | 0.15 [-0.12, 0.42]    | 0.01 [-0.26, 0.29]     |
| Control                                         | 0.09 [-0.22, 0.39]    | 0.06 [-0.25, 0.36]    | 0.11 [-0.20, 0.41]     |
| Sedentary behavior (min/day)                    |                       |                       |                        |
| Intervention                                    | -0.20 [-0.48, 0.07]   | -0.25 [-0.52, 0.02]   | -0.10 [-0.37, 0.17]    |
| Control                                         | -0.06 [-0.36, 0.24]   | 0.03 [-0.27, 0.33]    | -0.17 [-0.47, 0.13]    |
| Light intensity physical activity (min/week)    |                       |                       |                        |
| Intervention                                    | 0.10 [-0.18, 0.37]    | 0.07 [-0.20, 0.34]    | -0.05 [-0.32, 0.23]    |
| Control                                         | 0.25 [-0.05, 0.56]    | 0.01 [-0.29, 0.31]    | 0.08 [-0.22, 0.38]     |
| Moderate intensity physical activity (min/week) |                       |                       |                        |
| Intervention                                    | -0.10 [-0.37, 0.18]   | -0.05 [-0.32, 0.23]   | 0.06 [-0.21, 0.33]     |
| Control                                         | -0.16 [-0.46, 0.14]   | -0.02 [-0.32, 0.28]   | 0.03 [-0.77, 0.34]     |
| Vigorous intensity physical activity (min/week) |                       |                       |                        |
| Intervention                                    | -0.06 [-0.33, 0.21]   | 0.10 [-0.17, 0.37]    | 0.08 [-0.19, 0.36]     |
| Control                                         | -0.08 [-0.38, 0.22]   | 0.03 [-0.28, 0.33]    | -0.07 [-0.37, 0.23]    |
| Total physical activity (min/week)              |                       |                       |                        |
| Intervention                                    | 0.07 [-0.20, 0.35]    | 0.07 [-0.20, 0.34]    | -0.03 [-0.30, 0.24]    |
| Control                                         | 0.18 [-0.12, 0.48]    | 0.04 [-0.26, 0.34]    | 0.07 [-0.23, 0.37]     |

Data are presented as Cohen's  $d$  [ $\pm$  95% CI]. Interpretation:  $|d| = 0.2$ : small effect,  $|d| = 0.5$ : medium effect,  $|d| = 0.8$ : large effect. Intervention:  $n = 104$ , control:  $n = 85$ . ITT: intention-to-treat.

**Table S3.** Results of robust linear mixed models for physical activity behavior (Fitbit Charge 3™) (ITT analysis,  $n = 189$ ).

| Predictors              | Daily step count<br>(steps/day) |                 | Sedentary behavior<br>(min/day) |                 | Light intensity<br>physical activity<br>(min/week) |                 | Moderate intensity<br>physical activity<br>(min/week) |                 | Vigorous intensity<br>physical activity<br>(min/week) |                 | Total<br>physical activity<br>(min/week) |                 |
|-------------------------|---------------------------------|-----------------|---------------------------------|-----------------|----------------------------------------------------|-----------------|-------------------------------------------------------|-----------------|-------------------------------------------------------|-----------------|------------------------------------------|-----------------|
|                         | Estimate                        | <i>p</i> -value | Estimate                        | <i>p</i> -value | Estimate                                           | <i>p</i> -value | Estimate                                              | <i>p</i> -value | Estimate                                              | <i>p</i> -value | Estimate                                 | <i>p</i> -value |
| (Intercept)             | 10,308.11<br>± 703.31           | < 0.001*        | 873.06<br>± 51.00               | < 0.001*        | 1950.97<br>± 111.57                                | < 0.001*        | 129.53<br>± 20.01                                     | < 0.001*        | 150.04<br>± 23.94                                     | < 0.001*        | 2268.19<br>± 120.41                      | < 0.001*        |
| Time                    |                                 |                 |                                 |                 |                                                    |                 |                                                       |                 |                                                       |                 |                                          |                 |
| t0-t1<br>(0-3 months)   | 51.16<br>± 846.64               | 0.952           | -85.80<br>± 62.18               | 0.168           | 3.28<br>± 133.31                                   | 0.980           | 5.85<br>± 26.87                                       | 0.828           | 14.99<br>± 31.46                                      | 0.634           | 2.27<br>± 160.99                         | 0.989           |
| t0-t2<br>(0-9 months)   | 809.27<br>± 925.04              | 0.382           | -110.33<br>± 61.43              | 0.073           | 64.32<br>± 145.07                                  | 0.658           | 14.65<br>± 31.63                                      | 0.644           | 19.69<br>± 33.71                                      | 0.559           | 82.87<br>± 149.24                        | 0.579           |
| t0-t3<br>(0-15 months)  | -19.38<br>± 856.73              | 0.982           | -12.76<br>± 61.34               | 0.835           | -34.85<br>± 134.49                                 | 0.796           | 23.36<br>± 27.07                                      | 0.388           | 30.66<br>± 32.31                                      | 0.343           | -6.16<br>± 139.32                        | 0.965           |
| Group<br>(control)      | -200.82<br>± 459.09             | 0.662           | -29.19<br>± 33.44               | 0.383           | -59.06<br>± 72.66                                  | 0.417           | 14.70<br>± 13.14                                      | 0.264           | 17.50<br>± 15.66                                      | 0.264           | -29.90<br>± 78.20                        | 0.702           |
| Time*group<br>(control) |                                 |                 |                                 |                 |                                                    |                 |                                                       |                 |                                                       |                 |                                          |                 |
| t0-t1<br>(0-3 months)   | 92.37<br>± 555.99               | 0.868           | 35.24<br>± 40.09                | 0.380           | 56.91<br>± 86.31                                   | 0.510           | -9.11<br>± 17.55                                      | 0.604           | -16.19<br>± 20.46                                     | 0.429           | 40.28<br>± 100.47                        | 0.689           |
| t0-t2<br>(0-9 months)   | -344.20<br>± 604.98             | 0.570           | 57.54<br>± 39.79                | 0.149           | -21.95<br>± 88.75                                  | 0.805           | -11.71<br>± 20.68                                     | 0.572           | -12.71<br>± 22.11                                     | 0.566           | -35.47<br>± 94.96                        | 0.709           |
| t0-t3<br>(0-15 months)  | 124.00<br>± 566.13              | 0.827           | -9.26<br>± 40.49                | 0.819           | 34.57<br>± 80.29                                   | 0.667           | -14.62<br>± 18.50                                     | 0.430           | -20.08<br>± 21.07                                     | 0.341           | 16.17<br>± 91.33                         | 0.860           |

Data are presented as regression coefficient ± SE. Statistical significance ( $p < 0.05$ ) is indicated (\*). Intervention:  $n = 104$ , control:  $n = 85$ . ITT: intention-to-treat.

**Table S4.** Descriptive statistics for physical activity behavior (IPAQ-L) (ITT analysis,  $n = 189$ ).

| <b>Group</b>                                    | <b>t0<br/>(0 months)</b> | <b>t1<br/>(3 months)</b> | <b>t2<br/>(9 months)</b> | <b>t3<br/>(15 months)</b> |
|-------------------------------------------------|--------------------------|--------------------------|--------------------------|---------------------------|
| Sedentary behavior (min/day)                    |                          |                          |                          |                           |
| Intervention                                    | 443.36 ± 167.62          | 439.58 ± 147.93          | 449.02 ± 109.20          | 458.46 ± 120.93           |
| Control                                         | 471.44 ± 169.04          | 437.08 ± 163.50          | 465.31 ± 144.62          | 488.96 ± 128.98           |
| Light intensity physical activity (min/week)    |                          |                          |                          |                           |
| Intervention                                    | 325.02 ± 537.38          | 390.68 ± 442.65          | 381.71 ± 315.26          | 320.47 ± 326.88           |
| Control                                         | 253.89 ± 372.51          | 346.01 ± 400.61          | 344.68 ± 338.39          | 283.21 ± 190.10           |
| Moderate intensity physical activity (min/week) |                          |                          |                          |                           |
| Intervention                                    | 434.58 ± 483.85          | 651.80 ± 627.46          | 613.69 ± 500.82          | 569.41 ± 412.08           |
| Control                                         | 421.54 ± 481.48          | 666.34 ± 765.83          | 562.33 ± 511.38          | 563.56 ± 489.46           |
| Vigorous intensity physical activity (min/week) |                          |                          |                          |                           |
| Intervention                                    | 25.74 ± 129.73           | 127.80 ± 248.09          | 131.73 ± 294.81          | 77.23 ± 104.61            |
| Control                                         | 35.94 ± 147.92           | 120.28 ± 240.23          | 102.65 ± 218.47          | 62.15 ± 71.49             |
| Total physical activity (min/week)              |                          |                          |                          |                           |
| Intervention                                    | 785.34 ± 823.80          | 1196.30 ± 957.27         | 1121.94 ± 808.06         | 1020.21 ± 620.47          |
| Control                                         | 711.38 ± 771.52          | 1145.70 ± 1049.06        | 986.51 ± 799.02          | 931.66 ± 594.69           |

Data are presented as mean ± SD. Intervention:  $n = 104$ , control:  $n = 85$ . ITT: intention-to-treat; IPAQ-L: International Physical Activity Questionnaire (long version).

**Table S5.** Effect sizes for physical activity behavior (IPAQ-L) (ITT analysis,  $n = 189$ ).

| Group                                           | t0-t1<br>(0-3 months) | t0-t2<br>(0-9 months) | t0-t3<br>(0-15 months) |
|-------------------------------------------------|-----------------------|-----------------------|------------------------|
| Sedentary behavior (min/day)                    |                       |                       |                        |
| Intervention                                    | -0.02 [-0.30, 0.25]   | 0.04 [-0.23, 0.31]    | 0.10 [-0.17, 0.37]     |
| Control                                         | -0.21 [-0.51, 0.10]   | -0.04 [-0.34, 0.26]   | 0.12 [-0.19, 0.412]    |
| Light intensity physical activity (min/week)    |                       |                       |                        |
| Intervention                                    | 0.13 [-0.14, 0.41]    | 0.13 [-0.14, 0.40]    | -0.01 [-0.28, 0.26]    |
| Control                                         | 0.24 [-0.06, 0.54]    | 0.26 [-0.05, 0.56]    | 0.10 [-0.20, 0.40]     |
| Moderate intensity physical activity (min/week) |                       |                       |                        |
| Intervention                                    | 0.39 [0.11, 0.66]     | 0.36 [0.09, 0.64]     | 0.30 [0.03, 0.57]      |
| Control                                         | 0.38 [0.08, 0.69]     | 0.28 [-0.02, 0.59]    | 0.29 [-0.01, 0.59]     |
| Vigorous intensity physical activity (min/week) |                       |                       |                        |
| Intervention                                    | 0.52 [0.24, 0.79]     | 0.47 [0.19, 0.74]     | 0.44 [0.16, 0.71]      |
| Control                                         | 0.42 [0.12, 0.73]     | 0.36 [0.05, 0.66]     | 0.23 [-0.08, 0.53]     |
| Total physical activity (min/week)              |                       |                       |                        |
| Intervention                                    | 0.46 [0.18, 0.74]     | 0.41 [0.14, 0.69]     | 0.32 [0.05, 0.60]      |
| Control                                         | 0.47 [0.17, 0.78]     | 0.35 [0.05, 0.65]     | 0.32 [0.02, 0.62]      |

Data are presented as Cohen's  $d$  [ $\pm$  95% CI]. Interpretation:  $|d| = 0.2$ : small effect,  $|d| = 0.5$ : medium effect,  $|d| = 0.8$ : large effect. Intervention:  $n = 104$ , control:  $n = 85$ . ITT: intention-to-treat; IPAQ-L: International Physical Activity Questionnaire (long version).

**Table S6.** Results of robust linear mixed models for physical activity behavior (IPAQ-L) (ITT analysis,  $n = 189$ ).

| Predictors              | Sedentary behavior<br>(min/day) |                 | Light intensity<br>physical activity<br>(min/week) |                 | Moderate intensity<br>physical activity<br>(min/week) |                 | Vigorous intensity<br>physical activity<br>(min/week) |                 | Total<br>physical activity<br>(min/week) |                 |
|-------------------------|---------------------------------|-----------------|----------------------------------------------------|-----------------|-------------------------------------------------------|-----------------|-------------------------------------------------------|-----------------|------------------------------------------|-----------------|
|                         | Estimate                        | <i>p</i> -value | Estimate                                           | <i>p</i> -value | Estimate                                              | <i>p</i> -value | Estimate                                              | <i>p</i> -value | Estimate                                 | <i>p</i> -value |
| (Intercept)             | 405.51<br>± 35.71               | < 0.001*        | 234.66<br>± 49.37                                  | < 0.001*        | 371.48<br>± 85.27                                     | < 0.001*        | 2.06<br>± 13.92                                       | 0.882           | 692.17<br>± 137.29                       | < 0.001*        |
| Time                    |                                 |                 |                                                    |                 |                                                       |                 |                                                       |                 |                                          |                 |
| t0-t1<br>(0-3 months)   | 33.22<br>± 39.85                | 0.405           | 66.83<br>± 68.19                                   | 0.328           | 142.20<br>± 105.37                                    | 0.178           | 81.86<br>± 20.04                                      | < 0.001*        | 288.73<br>± 176.23                       | 0.102           |
| t0-t2<br>(0-9 months)   | 26.59<br>± 40.89                | 0.516           | 111.71<br>± 66.76                                  | 0.095           | 184.21<br>± 104.97                                    | 0.080           | 59.76<br>± 22.37                                      | 0.008*          | 335.26<br>± 194.05                       | 0.085           |
| t0-t3<br>(0-15 months)  | 21.41<br>± 38.84                | 0.582           | -2.55<br>± 70.86                                   | 0.971           | 100.95<br>± 113.47                                    | 0.374           | 40.16<br>± 20.98                                      | 0.056           | 186.58<br>± 183.27                       | 0.309           |
| Group<br>(control)      | 31.86<br>± 23.26                | 0.171           | -20.11<br>± 32.20                                  | 0.532           | -19.15<br>± 55.71                                     | 0.731           | 7.85<br>± 9.08                                        | 0.387           | -50.72<br>± 89.08                        | 0.569           |
| Time*group<br>(control) |                                 |                 |                                                    |                 |                                                       |                 |                                                       |                 |                                          |                 |
| t0-t1<br>(0-3 months)   | -32.63<br>± 25.85               | 0.207           | 6.13<br>± 43.81                                    | 0.889           | -0.01<br>± 68.62                                      | 1.000           | -23.19<br>± 13.49                                     | 0.086           | 26.91<br>± 112.08                        | 0.810           |
| t0-t2<br>(0-9 months)   | -16.90<br>± 28.42               | 0.552           | -25.35<br>± 42.55                                  | 0.551           | -41.97<br>± 67.48                                     | 0.534           | -16.95<br>± 14.21                                     | 0.233           | -49.85<br>± 124.87                       | 0.690           |
| t0-t3<br>(0-15 months)  | 0.062<br>± 25.71                | 0.998           | 27.31<br>± 44.17                                   | 0.537           | -0.31<br>± 71.43                                      | 0.996           | -8.23<br>± 13.61                                      | 0.546           | 10.97<br>± 122.20                        | 0.929           |

Data are presented as regression coefficient ± SE. Statistical significance ( $p < 0.05$ ) is indicated (\*). Intervention:  $n = 104$ , control:  $n = 85$ . ITT: intention-to-treat; IPAQ-L: International Physical Activity Questionnaire (long version).

**Table S7.** Descriptive statistics for dietary behavior (ITT analysis,  $n = 189$ ).

| <b>Group</b>                | <b>t0<br/>(0 months)</b> | <b>t1<br/>(3 months)</b> | <b>t2<br/>(9 months)</b> | <b>t3<br/>(15 months)</b> |
|-----------------------------|--------------------------|--------------------------|--------------------------|---------------------------|
| Energy intake (kcal/day)    |                          |                          |                          |                           |
| Intervention                | 1941.23 $\pm$ 599.36     | 1833.72 $\pm$ 503.54     | 1887.85 $\pm$ 421.60     | 1859.62 $\pm$ 364.42      |
| Control                     | 2001.47 $\pm$ 548.75     | 1887.95 $\pm$ 479.22     | 1859.15 $\pm$ 390.06     | 1857.71 $\pm$ 378.19      |
| Protein intake (g/day)      |                          |                          |                          |                           |
| Intervention                | 71.58 $\pm$ 20.93        | 63.99 $\pm$ 16.29        | 71.62 $\pm$ 16.49        | 68.53 $\pm$ 13.96         |
| Control                     | 70.63 $\pm$ 20.51        | 66.13 $\pm$ 16.57        | 66.96 $\pm$ 16.78        | 69.55 $\pm$ 15.66         |
| Fat intake (g/day)          |                          |                          |                          |                           |
| Intervention                | 75.95 $\pm$ 30.60        | 71.11 $\pm$ 24.24        | 75.05 $\pm$ 18.80        | 73.81 $\pm$ 20.61         |
| Control                     | 79.74 $\pm$ 28.98        | 77.30 $\pm$ 26.21        | 75.84 $\pm$ 21.56        | 74.91 $\pm$ 19.05         |
| Carbohydrate intake (g/day) |                          |                          |                          |                           |
| Intervention                | 212.84 $\pm$ 71.64       | 205.46 $\pm$ 59.35       | 201.91 $\pm$ 53.18       | 202.24 $\pm$ 45.65        |
| Control                     | 217.65 $\pm$ 65.82       | 204.14 $\pm$ 54.34       | 196.03 $\pm$ 42.35       | 201.82 $\pm$ 47.97        |
| Alcohol intake (g/day)      |                          |                          |                          |                           |
| Intervention                | 9.30 $\pm$ 13.84         | 8.86 $\pm$ 13.20         | 6.86 $\pm$ 10.63         | 10.47 $\pm$ 10.32         |
| Control                     | 9.42 $\pm$ 11.79         | 8.79 $\pm$ 11.93         | 8.34 $\pm$ 8.12          | 7.70 $\pm$ 6.41           |
| Fiber intake (g/day)        |                          |                          |                          |                           |
| Intervention                | 22.73 $\pm$ 8.88         | 20.09 $\pm$ 6.22         | 20.21 $\pm$ 5.36         | 20.27 $\pm$ 5.17          |
| Control                     | 22.29 $\pm$ 8.75         | 20.61 $\pm$ 6.73         | 20.32 $\pm$ 6.57         | 21.10 $\pm$ 6.07          |
| HEI-NVS (score)             |                          |                          |                          |                           |
| Intervention                | 77.53 $\pm$ 8.92         | 75.49 $\pm$ 8.80         | 75.80 $\pm$ 8.10         | 75.14 $\pm$ 8.18          |
| Control                     | 76.59 $\pm$ 9.53         | 75.84 $\pm$ 8.43         | 75.67 $\pm$ 8.94         | 76.83 $\pm$ 7.22          |

Data are presented as mean  $\pm$  SD. Intervention:  $n = 104$ , control:  $n = 85$ . ITT: intention-to-treat; HEI-NVS: Healthy Eating Index of the German National Nutrition Survey.

**Table S8.** Effect sizes for dietary behavior (ITT analysis,  $n = 189$ ).

| Group                       | t0-t1<br>(0-3 months) | t0-t2<br>(0-9 months) | t0-t3<br>(0-15 months) |
|-----------------------------|-----------------------|-----------------------|------------------------|
| Energy intake (kcal/day)    |                       |                       |                        |
| Intervention                | -0.19 [-0.47, 0.08]   | -0.10 [-0.38, 0.17]   | -0.17 [-0.44, 0.11]    |
| Control                     | -0.22 [-0.52, 0.08]   | -0.30 [-0.60, 0.00]   | -0.31 [-0.61, -0.00]   |
| Protein intake (g/day)      |                       |                       |                        |
| Intervention                | -0.41 [-0.68, -0.13]  | 0.00 [-0.27, 0.27]    | -0.17 [-0.44, 0.10]    |
| Control                     | -0.24 [-0.54, 0.06]   | -0.20 [-0.50, 0.11]   | -0.06 [-0.36, 0.24]    |
| Fat intake (g/day)          |                       |                       |                        |
| Intervention                | -0.18 [-0.45, 0.10]   | -0.04 [-0.31, 0.24]   | -0.08 [-0.35, 0.19]    |
| Control                     | -0.09 [-0.39, 0.21]   | -0.15 [-0.45, 0.15]   | -0.12 [-0.50, 0.11]    |
| Carbohydrate intake (g/day) |                       |                       |                        |
| Intervention                | -0.11 [-0.38, 0.16]   | -0.17 [-0.45, 0.10]   | -0.18 [-0.45, 0.10]    |
| Control                     | -0.22 [-0.53, 0.08]   | -0.39 [-0.69, -0.09]  | -0.28 [-0.58, 0.03]    |
| Alcohol intake (g/day)      |                       |                       |                        |
| Intervention                | -0.03 [-0.31, 0.24]   | -0.20 [-0.47, 0.08]   | 0.10 [-0.18, 0.37]     |
| Control                     | -0.05 [-0.35, 0.25]   | -0.11 [-0.41, 0.20]   | -0.18 [-0.48, 0.12]    |
| Fiber intake (g/day)        |                       |                       |                        |
| Intervention                | -0.34 [-0.62, -0.07]  | -0.34 [-0.62, -0.07]  | -0.34 [-0.61, -0.06]   |
| Control                     | -0.22 [-0.52, 0.09]   | -0.26 [-0.56, 0.05]   | -0.16 [-0.46, 0.14]    |
| HEI-NVS (score)             |                       |                       |                        |
| Intervention                | -0.23 [-0.50, 0.04]   | -0.20 [-0.48, 0.07]   | -0.28 [-0.55, -0.01]   |
| Control                     | -0.08 [-0.38, 0.22]   | -0.10 [-0.40, 0.20]   | 0.03 [-0.27, 0.33]     |

Data are presented as Cohen's  $d$  [ $\pm$  95% CI]. Interpretation:  $|d| = 0.2$ : small effect,  $|d| = 0.5$ : medium effect,  $|d| = 0.8$ : large effect. Intervention:  $n = 104$ , control:  $n = 85$ . ITT: intention-to-treat; HEI-NVS: Healthy Eating Index of the German National Nutrition Survey.



**Table S9.** Results of robust linear mixed models for dietary behavior (ITT analysis,  $n = 189$ ).

| Predictors              | Energy intake<br>(kcal/day) |                 | Protein intake<br>(g/day) |                 | Fat intake<br>(g/day) |                 | Carbohydrate intake<br>(g/day) |                 | Alcohol intake<br>(g/day) |                 | Fiber intake<br>(g/day) |                 | HEI-NVS<br>(score) |                 |
|-------------------------|-----------------------------|-----------------|---------------------------|-----------------|-----------------------|-----------------|--------------------------------|-----------------|---------------------------|-----------------|-------------------------|-----------------|--------------------|-----------------|
|                         | Estimate                    | <i>p</i> -value | Estimate                  | <i>p</i> -value | Estimate              | <i>p</i> -value | Estimate                       | <i>p</i> -value | Estimate                  | <i>p</i> -value | Estimate                | <i>p</i> -value | Estimate           | <i>p</i> -value |
| (Intercept)             | 1790.72<br>± 115.87         | < 0.001*        | 70.91<br>± 3.99           | < 0.001*        | 66.32<br>± 5.73       | < 0.001*        | 203.80<br>± 13.69              | < 0.001*        | 6.43<br>± 1.54            | < 0.001*        | 22.32<br>± 1.60         | < 0.001*        | 79.21<br>± 2.07    | < 0.001*        |
| Time                    |                             |                 |                           |                 |                       |                 |                                |                 |                           |                 |                         |                 |                    |                 |
| t0-t1<br>(0-3 months)   | -30.55<br>± 137.24          | 0.824           | -9.27<br>± 4.94           | 0.061           | -2.72<br>± 7.04       | 0.700           | 0.23<br>± 15.81                | 0.988           | -1.19<br>± 1.74           | 0.493           | -2.93<br>± 1.84         | 0.112           | -3.33<br>± 2.63    | 0.207           |
| t0-t2<br>(0-9 months)   | 92.21<br>± 143.62           | 0.521           | 2.93<br>± 5.48            | 0.593           | 6.58<br>± 7.00        | 0.349           | 0.18<br>± 15.62                | 0.991           | -3.74<br>± 1.81           | 0.039*          | -2.23<br>± 1.90         | 0.241           | -2.50<br>± 2.61    | 0.338           |
| t0-t3<br>(0-15 months)  | 41.34<br>± 156.02           | 0.791           | -5.13<br>± 6.05           | 0.397           | 4.34<br>± 8.26        | 0.600           | 0.31<br>± 17.17                | 0.986           | 2.15<br>± 2.12            | 0.312           | -3.17<br>± 1.95         | 0.104           | -4.51<br>± 2.74    | 0.100           |
| Group<br>(control)      | 103.24<br>± 75.50           | 0.172           | -0.61<br>± 2.61           | 0.813           | 6.01<br>± 3.75        | 0.110           | 5.80<br>± 8.99                 | 0.519           | 0.43<br>± 1.01            | 0.666           | -0.49<br>± 1.04         | 0.641           | -1.27<br>± 1.35    | 0.346           |
| Time*group<br>(control) |                             |                 |                           |                 |                       |                 |                                |                 |                           |                 |                         |                 |                    |                 |
| t0-t1<br>(0-3 months)   | -53.19<br>± 89.92           | 0.554           | 2.18<br>± 3.22            | 0.498           | -0.17<br>± 4.55       | 0.971           | -7.28<br>± 10.16               | 0.474           | 0.20<br>± 1.13            | 0.857           | 0.75<br>± 1.19          | 0.531           | 1.29<br>± 1.72     | 0.453           |
| t0-t2<br>(0-9 months)   | -121.47<br>± 93.38          | 0.194           | -3.23<br>± 3.60           | 0.369           | -5.25<br>± 4.63       | 0.257           | -10.35<br>± 10.18              | 0.310           | 1.51<br>± 1.21            | 0.212           | 0.28<br>± 1.22          | 0.815           | 0.87<br>± 1.70     | 0.609           |
| t0-t3<br>(0-15 months)  | -101.72<br>± 100.14         | 0.310           | 1.82<br>± 3.73            | 0.625           | -4.84<br>± 5.52       | 0.382           | -9.46<br>± 10.85               | 0.384           | -1.70<br>± 1.32           | 0.200           | 1.18<br>± 1.27          | 0.353           | 2.30<br>± 1.72     | 0.181           |

Data are presented as regression coefficient ± SE. Statistical significance ( $p < 0.05$ ) is indicated (\*). Intervention:  $n = 104$ , control:  $n = 85$ . ITT: intention-to-treat; HEI-NVS: Healthy Eating Index of the German National Nutrition Survey.

**Table S10.** Descriptive statistics for anthropometry and blood pressure (ITT analysis,  $n = 189$ ).

| Group                           | t0<br>(0 months) | t1<br>(3 months) | t2<br>(9 months) | t3<br>(15 months) |
|---------------------------------|------------------|------------------|------------------|-------------------|
| Body weight (kg)                |                  |                  |                  |                   |
| Intervention                    | 74.99 ± 13.01    | 73.96 ± 11.81    | 74.35 ± 10.59    | 73.70 ± 10.09     |
| Control                         | 74.25 ± 14.57    | 73.31 ± 12.81    | 73.85 ± 12.04    | 73.95 ± 11.49     |
| Body height (m)                 |                  |                  |                  |                   |
| Intervention                    | 1.70 ± 0.08      | 1.70 ± 0.08      | 1.70 ± 0.07      | 1.70 ± 0.07       |
| Control                         | 1.71 ± 0.08      | 1.71 ± 0.07      | 1.71 ± 0.07      | 1.71 ± 0.06       |
| BMI (kg/m <sup>2</sup> )        |                  |                  |                  |                   |
| Intervention                    | 25.86 ± 3.50     | 25.54 ± 3.04     | 25.27 ± 2.60     | 25.32 ± 2.69      |
| Control                         | 25.19 ± 3.84     | 24.95 ± 3.42     | 25.46 ± 3.42     | 25.35 ± 3.23      |
| Fat mass (kg)                   |                  |                  |                  |                   |
| Intervention                    | 25.56 ± 7.78     | 25.01 ± 6.72     | 24.88 ± 5.35     | 24.44 ± 5.79      |
| Control                         | 24.68 ± 7.28     | 24.34 ± 6.68     | 24.65 ± 6.72     | 24.41 ± 6.23      |
| Fat-free mass (kg)              |                  |                  |                  |                   |
| Intervention                    | 49.43 ± 9.76     | 48.58 ± 9.03     | 48.88 ± 8.09     | 48.60 ± 7.67      |
| Control                         | 49.18 ± 10.79    | 48.96 ± 9.60     | 48.69 ± 8.41     | 49.13 ± 8.12      |
| Waist circumference (cm)        |                  |                  |                  |                   |
| Intervention                    | 89.29 ± 10.89    | 88.06 ± 9.14     | 87.85 ± 7.78     | 86.67 ± 8.13      |
| Control                         | 87.32 ± 12.06    | 86.77 ± 9.68     | 86.88 ± 9.54     | 87.02 ± 9.13      |
| Systolic blood pressure (mmHg)  |                  |                  |                  |                   |
| Intervention                    | 123.29 ± 12.58   | 124.32 ± 14.03   | 125.17 ± 11.77   | 126.57 ± 11.98    |
| Control                         | 125.82 ± 14.24   | 124.82 ± 15.13   | 124.47 ± 11.64   | 126.25 ± 11.52    |
| Diastolic blood pressure (mmHg) |                  |                  |                  |                   |
| Intervention                    | 83.04 ± 8.37     | 83.78 ± 8.62     | 84.83 ± 7.72     | 84.28 ± 6.95      |
| Control                         | 86.06 ± 9.22     | 85.21 ± 9.80     | 84.66 ± 7.22     | 84.98 ± 7.75      |
| Heart rate (bpm)                |                  |                  |                  |                   |
| Intervention                    | 66.24 ± 9.70     | 63.08 ± 8.56     | 64.66 ± 6.97     | 64.83 ± 7.01      |
| Control                         | 69.39 ± 11.68    | 65.88 ± 9.14     | 65.04 ± 7.49     | 65.04 ± 7.39      |

Data are presented as mean ± SD. Intervention:  $n = 104$ , control:  $n = 85$ . ITT: intention-to-treat; BMI: body mass index.

**Table S11.** Effect sizes for anthropometry and blood pressure (ITT analysis,  $n = 189$ ).

| Group                           | t0-t1<br>(0-3 months) | t0-t2<br>(0-9 months) | t0-t3<br>(0-15 months) |
|---------------------------------|-----------------------|-----------------------|------------------------|
| Body weight (kg)                |                       |                       |                        |
| Intervention                    | -0.08 [-0.35, 0.19]   | -0.05 [-0.33, 0.22]   | -0.11 [-0.38, 0.16]    |
| Control                         | -0.07 [-0.37, 0.23]   | -0.03 [-0.33, 0.27]   | -0.02 [-0.32, 0.28]    |
| Body height (m)                 |                       |                       |                        |
| Intervention                    | 0.00 [-0.27, 0.27]    | -0.01 [-0.28, 0.26]   | 0.02 [-0.25, 0.29]     |
| Control                         | -0.01 [-0.31, 0.29]   | -0.04 [-0.34, 0.26]   | 0.02 [-0.28, 0.32]     |
| BMI (kg/m <sup>2</sup> )        |                       |                       |                        |
| Intervention                    | -0.01 [-0.37, 0.178]  | -0.19 [-0.46, 0.09]   | -0.17 [-0.45, 0.10]    |
| Control                         | -0.07 [-0.37, 0.24]   | 0.07 [-0.23, 0.38]    | 0.05 [-0.26, 0.35]     |
| Fat mass (kg)                   |                       |                       |                        |
| Intervention                    | -0.08 [-0.35, 0.20]   | -0.10 [-0.37, 0.17]   | -0.16 [-0.44, 0.11]    |
| Control                         | -0.05 [-0.35, 0.25]   | -0.00 [-0.31, 0.30]   | -0.04 [-0.34, 0.26]    |
| Fat-free mass (kg)              |                       |                       |                        |
| Intervention                    | -0.09 [-0.36, 0.18]   | -0.06 [-0.33, 0.21]   | -0.09 [-0.37, 0.18]    |
| Control                         | -0.02 [-0.32, 0.28]   | -0.05 [-0.35, 0.25]   | -0.01 [-0.31, 0.30]    |
| Waist circumference (cm)        |                       |                       |                        |
| Intervention                    | -0.12 [-0.40, 0.15]   | -0.15 [-0.43, 0.12]   | -0.27 [-0.55, 0.00]    |
| Control                         | -0.05 [-0.35, 0.25]   | -0.04 [-0.34, 0.26]   | -0.03 [-0.33, 0.27]    |
| Systolic blood pressure (mmHg)  |                       |                       |                        |
| Intervention                    | 0.08 [-0.20, 0.35]    | 0.15 [-0.12, 0.43]    | 0.27 [-0.01, 0.54]     |
| Control                         | -0.07 [-0.37, 0.23]   | -0.10 [-0.41, 0.20]   | 0.03 [-0.27, 0.33]     |
| Diastolic blood pressure (mmHg) |                       |                       |                        |
| Intervention                    | 0.09 [-0.18, 0.36]    | 0.22 [-0.05, 0.50]    | 0.16 [-0.11, 0.43]     |
| Control                         | -0.09 [-0.39, 0.21]   | -0.17 [-0.47, 0.13]   | -0.13 [-0.43, 0.17]    |
| Heart rate (bpm)                |                       |                       |                        |
| Intervention                    | -0.35 [-0.62, -0.07]  | -0.19 [-0.46, 0.09]   | -0.17 [-0.44, 0.11]    |
| Control                         | -0.34 [-0.64, -0.03]  | -0.44 [-0.75, -0.14]  | -0.45 [-0.75, -0.14]   |

Data are presented as Cohen's  $d$  [ $\pm$  95% CI]. Interpretation:  $|d| = 0.2$ : small effect,  $|d| = 0.5$ : medium effect,  $|d| = 0.8$ : large effect. Intervention:  $n = 104$ , control:  $n = 85$ . ITT: intention-to-treat; BMI: body mass index.

**Table S12.** Results of robust linear mixed models for anthropometry and blood pressure (ITT analysis,  $n = 189$ ).

| Predictors              | Body weight<br>(kg) |            | Body height<br>(m) |            | BMI<br>(kg/m <sup>2</sup> ) |            | Fat mass<br>(kg) |            | Fat-free mass<br>(kg) |            | Waist<br>circumference<br>(cm) |            | Systolic<br>blood pressure<br>(mmHg) |            | Diastolic<br>blood pressure<br>(mmHg) |            | Heart rate<br>(bpm) |            |
|-------------------------|---------------------|------------|--------------------|------------|-----------------------------|------------|------------------|------------|-----------------------|------------|--------------------------------|------------|--------------------------------------|------------|---------------------------------------|------------|---------------------|------------|
|                         | Estimate            | $p$ -value | Estimate           | $p$ -value | Estimate                    | $p$ -value | Estimate         | $p$ -value | Estimate              | $p$ -value | Estimate                       | $p$ -value | Estimate                             | $p$ -value | Estimate                              | $p$ -value | Estimate            | $p$ -value |
| (Intercept)             | 74.29<br>± 2.83     | < 0.001*   | 1.69<br>± 0.02     | < 0.001*   | 26.36<br>± 0.76             | < 0.001*   | 25.83<br>± 1.52  | < 0.001*   | 47.78<br>± 1.82       | < 0.001*   | 91.12<br>± 2.31                | < 0.001*   | 120.84<br>± 3.08                     | < 0.001*   | 80.35<br>± 1.92                       | < 0.001*   | 63.68<br>± 2.10     | < 0.001*   |
| Time                    |                     |            |                    |            |                             |            |                  |            |                       |            |                                |            |                                      |            |                                       |            |                     |            |
| t0-t1<br>(0-3 months)   | -0.95<br>± 1.62     | 0.558      | -0.00<br>± 0.01    | 0.898      | -0.24<br>± 0.49             | 0.632      | -0.44<br>± 1.05  | 0.675      | -0.96<br>± 0.91       | 0.292      | -1.55<br>± 1.71                | 0.367      | 3.07<br>± 3.04                       | 0.313      | 2.87<br>± 1.85                        | 0.121      | -2.74<br>± 2.15     | 0.203      |
| t0-t2<br>(0-9 months)   | -1.60<br>± 2.17     | 0.462      | -0.00<br>± 0.01    | 0.917      | -1.04<br>± 0.68             | 0.132      | -1.15<br>± 1.17  | 0.329      | -0.89<br>± 0.85       | 0.297      | -2.31<br>± 1.92                | 0.231      | 4.76<br>± 3.02                       | 0.115      | 4.58<br>± 2.20                        | 0.039*     | 0.48<br>± 2.69      | 0.860      |
| t0-t3<br>(0-15 months)  | -1.76<br>± 1.96     | 0.372      | -0.00<br>± 0.01    | 0.919      | -0.84<br>± 0.67             | 0.217      | -1.59<br>± 1.10  | 0.148      | -1.23<br>± 1.06       | 0.249      | -3.81<br>± 1.84                | 0.039*     | 5.40<br>± 3.03                       | 0.075      | 3.96<br>± 2.14                        | 0.066      | 1.15<br>± 2.24      | 0.607      |
| Group<br>(control)      | -0.46<br>± 1.85     | 0.802      | 0.01<br>± 0.01     | 0.494      | -0.70<br>± 0.49             | 0.154      | -0.78<br>± 0.98  | 0.429      | -0.20<br>± 1.16       | 0.860      | -2.23<br>± 1.52                | 0.141      | 2.17<br>± 2.01                       | 0.279      | 2.85<br>± 1.25                        | 0.023*     | 2.69<br>± 1.37      | 0.049*     |
| Time*group<br>(control) |                     |            |                    |            |                             |            |                  |            |                       |            |                                |            |                                      |            |                                       |            |                     |            |
| t0-t1<br>(0-3 months)   | 0.18<br>± 1.05      | 0.863      | 0.00<br>± 0.00     | 0.884      | 0.04<br>± 0.31              | 0.885      | -0.02<br>± 0.67  | 0.982      | 0.53<br>± 0.58        | 0.366      | 0.55<br>± 1.12                 | 0.623      | -2.47<br>± 2.01                      | 0.220      | -2.07<br>± 1.20                       | 0.086      | -0.47<br>± 1.40     | 0.737      |
| t0-t2<br>(0-9 months)   | 0.74<br>± 1.41      | 0.598      | -0.00<br>± 0.00    | 0.880      | 0.63<br>± 0.42              | 0.133      | 0.54<br>± 0.78   | 0.488      | 0.45<br>± 0.56        | 0.424      | 0.88<br>± 1.23                 | 0.473      | -3.25<br>± 1.94                      | 0.094      | -3.05<br>± 1.34                       | 0.023*     | -2.37<br>± 1.75     | 0.177      |
| t0-t3<br>(0-15 months)  | 0.76<br>± 1.29      | 0.558      | 0.00<br>± 0.00     | 0.988      | 0.46<br>± 0.43              | 0.287      | 0.60<br>± 0.71   | 0.394      | 0.70<br>± 0.72        | 0.331      | 1.67<br>± 1.19                 | 0.162      | -2.67<br>± 2.02                      | 0.186      | -2.66<br>± 1.36                       | 0.051      | -2.80<br>± 1.47     | 0.058      |

Data are presented as regression coefficient ± SE. Statistical significance ( $p < 0.05$ ) is indicated (\*). Intervention:  $n = 104$ , control:  $n = 85$ . ITT: intention-to-treat; BMI: body mass index.

**Table S13.** Descriptive statistics for blood levels and vascular health (ITT analysis,  $n = 189$ ).

| Group                          | t0<br>(0 months)    | t1<br>(3 months)    | t2<br>(9 months)    | t3<br>(15 months)   |
|--------------------------------|---------------------|---------------------|---------------------|---------------------|
| Fasting plasma glucose (mg/dL) |                     |                     |                     |                     |
| Intervention                   | 88.55 ± 9.10        | 87.38 ± 7.28        | 86.09 ± 7.40        | 86.75 ± 6.54        |
| Control                        | 87.71 ± 8.46        | 87.35 ± 8.82        | 86.73 ± 9.08        | 86.56 ± 7.03        |
| HbA <sub>1c</sub> (%)          |                     |                     |                     |                     |
| Intervention                   | 5.35 ± 0.34         | 5.40 ± 0.29         | 5.42 ± 0.24         | 5.40 ± 0.24         |
| Control                        | 5.32 ± 0.32         | 5.32 ± 0.29         | 5.38 ± 0.28         | 5.39 ± 0.27         |
| Triglycerides (mg/dL)          |                     |                     |                     |                     |
| Intervention                   | 114.59 ± 71.68      | 109.44 ± 56.87      | 104.70 ± 61.56      | 100.79 ± 46.85      |
| Control                        | 92.41 ± 32.04       | 93.29 ± 37.55       | 93.18 ± 32.23       | 97.91 ± 41.31       |
| Total cholesterol (mg/dL)      |                     |                     |                     |                     |
| Intervention                   | 216.30 ± 38.58      | 215.59 ± 34.92      | 212.07 ± 31.83      | 212.14 ± 30.67      |
| Control                        | 217.49 ± 42.04      | 210.72 ± 37.73      | 205.63 ± 33.47      | 209.81 ± 32.06      |
| HDL cholesterol (mg/dL)        |                     |                     |                     |                     |
| Intervention                   | 63.33 ± 14.21       | 63.63 ± 12.25       | 64.04 ± 11.82       | 64.54 ± 11.92       |
| Control                        | 63.48 ± 13.58       | 64.27 ± 13.27       | 62.30 ± 10.99       | 61.98 ± 11.41       |
| LDL cholesterol (mg/dL)        |                     |                     |                     |                     |
| Intervention                   | 130.76 ± 30.92      | 139.19 ± 29.63      | 140.25 ± 24.63      | 135.79 ± 24.97      |
| Control                        | 135.48 ± 36.32      | 136.39 ± 33.31      | 136.91 ± 27.11      | 138.08 ± 26.96      |
| FMD (%)                        |                     |                     |                     |                     |
| Intervention                   | 9.04 ± 1.88         | 9.02 ± 1.74         | 9.00 ± 1.28         | 9.54 ± 1.28         |
| Control                        | 9.15 ± 1.92         | 9.23 ± 2.00         | 9.29 ± 1.79         | 9.40 ± 1.53         |
| Vascular age (days)            |                     |                     |                     |                     |
| Intervention                   | 19,829.27 ± 5946.48 | 19,873.32 ± 5255.34 | 19,705.75 ± 4231.25 | 19,326.56 ± 4052.77 |
| Control                        | 19,556.30 ± 5951.33 | 18,975.68 ± 5021.05 | 19,306.42 ± 5080.32 | 19,583.78 ± 4744.77 |

Data are presented as mean ± SD. Intervention:  $n = 104$ , control:  $n = 85$ . ITT: intention-to-treat; HbA<sub>1c</sub>: glycated hemoglobin; HDL: high-density lipoprotein; LDL: low-density lipoprotein; FMD: flow-mediated dilatation.

**Table S14.** Effect sizes for blood levels and vascular health (ITT analysis,  $n = 189$ ).

| Group                          | t0-t1<br>(0-3 months) | t0-t2<br>(0-9 months) | t0-t3<br>(0-15 months) |
|--------------------------------|-----------------------|-----------------------|------------------------|
| Fasting plasma glucose (mg/dL) |                       |                       |                        |
| Intervention                   | -0.14 [-0.41, 0.13]   | -0.30 [-0.57, -0.02]  | -0.23 [-0.50, 0.05]    |
| Control                        | -0.04 [-0.34, 0.26]   | -0.11 [-0.41, 0.19]   | -0.15 [-0.45, 0.15]    |
| HbA <sub>1c</sub> (%)          |                       |                       |                        |
| Intervention                   | 0.15 [-0.12, 0.43]    | 0.24 [-0.03, 0.51]    | 0.17 [-0.10, 0.44]     |
| Control                        | -0.02 [-0.32, 0.28]   | 0.21 [-0.10, 0.51]    | 0.23 [-0.08, 0.53]     |
| Triglycerides (mg/dL)          |                       |                       |                        |
| Intervention                   | -0.08 [-0.35, 0.19]   | -0.15 [-0.42, 0.12]   | -0.23 [-0.50, 0.05]    |
| Control                        | 0.03 [-0.28, 0.33]    | 0.02 [-0.28, 0.32]    | 0.15 [-0.15, 0.45]     |
| Total cholesterol (mg/dL)      |                       |                       |                        |
| Intervention                   | -0.02 [-0.29, 0.25]   | -0.12 [-0.39, 0.15]   | -0.12 [-0.39, 0.15]    |
| Control                        | -0.17 [-0.47, 0.13]   | -0.31 [-0.61, -0.01]  | -0.21 [-0.51, 0.10]    |
| HDL cholesterol (mg/dL)        |                       |                       |                        |
| Intervention                   | 0.02 [-0.25, 0.30]    | 0.06 [-0.22, 0.33]    | 0.09 [-0.18, 0.36]     |
| Control                        | 0.06 [-0.24, 0.36]    | -0.10 [-0.40, 0.22]   | -0.12 [-0.42, 0.18]    |
| LDL cholesterol (mg/dL)        |                       |                       |                        |
| Intervention                   | 0.28 [0.01, 0.55]     | 0.34 [0.07, 0.61]     | 0.18 [-0.09, 0.45]     |
| Control                        | 0.03 [-0.28, 0.33]    | 0.04 [-0.26, 0.35]    | 0.08 [-0.22, 0.38]     |
| FMD (%)                        |                       |                       |                        |
| Intervention                   | -0.02 [-0.29, 0.26]   | -0.03 [-0.30, 0.25]   | 0.31 [0.04, 0.59]      |
| Control                        | 0.04 [-0.26, 0.34]    | 0.08 [-0.23, 0.38]    | 0.14 [-0.16, 0.44]     |
| Vascular age (days)            |                       |                       |                        |
| Intervention                   | 0.01 [-0.26, 0.28]    | -0.02 [-0.30, 0.25]   | -0.10 [-0.37, 0.17]    |
| Control                        | -0.11 [-0.41, 0.20]   | -0.05 [-0.35, 0.26]   | 0.01 [-0.30, 0.31]     |

Data are presented as Cohen's  $d$  [ $\pm$  95% CI]. Interpretation:  $|d| = 0.2$ : small effect,  $|d| = 0.5$ : medium effect,  $|d| = 0.8$ : large effect. Intervention:  $n = 104$ , control:  $n = 85$ . ITT: intention-to-treat; HbA<sub>1c</sub>: glycated hemoglobin; HDL: high-density lipoprotein; LDL: low-density lipoprotein; FMD: flow-mediated dilatation.

**Table S15.** Results of robust linear mixed models for blood levels and vascular health (ITT analysis,  $n = 189$ ).

| Predictors              | Fasting plasma glucose (mg/dL) |                 | HbA <sub>1c</sub> (%) |                 | Triglycerides (mg/dL) |                 | Total cholesterol (mg/dL) |                 | HDL cholesterol (mg/dL) |                 | LDL cholesterol (mg/dL) |                 | FMD (%)         |                 | Vascular age (days)    |                 |
|-------------------------|--------------------------------|-----------------|-----------------------|-----------------|-----------------------|-----------------|---------------------------|-----------------|-------------------------|-----------------|-------------------------|-----------------|-----------------|-----------------|------------------------|-----------------|
|                         | Estimate                       | <i>p</i> -value | Estimate              | <i>p</i> -value | Estimate              | <i>p</i> -value | Estimate                  | <i>p</i> -value | Estimate                | <i>p</i> -value | Estimate                | <i>p</i> -value | Estimate        | <i>p</i> -value | Estimate               | <i>p</i> -value |
| (Intercept)             | 88.43<br>± 1.58                | < 0.001*        | 5.40<br>± 0.06        | < 0.001*        | 109.84<br>± 8.22      | < 0.001*        | 216.19<br>± 8.43          | < 0.001*        | 62.76<br>± 2.88         | < 0.001*        | 127.30<br>± 7.15        | < 0.001*        | 8.89<br>± 0.40  | < 0.001*        | 20,944.28<br>± 1139.65 | < 0.001*        |
| Time                    |                                |                 |                       |                 |                       |                 |                           |                 |                         |                 |                         |                 |                 |                 |                        |                 |
| t0-t1<br>(0-3 months)   | -0.86<br>± 1.74                | 0.622           | 0.10<br>± 0.05        | 0.077           | -4.49<br>± 8.20       | 0.584           | 2.23<br>± 7.77            | 0.774           | -0.19<br>± 2.39         | 0.938           | 14.60<br>± 6.86         | 0.034*          | -0.04<br>± 0.58 | 0.948           | 520.05<br>± 795.35     | 0.513           |
| t0-t2<br>(0-9 months)   | -3.22<br>± 1.81                | 0.076           | 0.09<br>± 0.06        | 0.141           | -17.39<br>± 8.24      | 0.035*          | 0.82<br>± 7.50            | 0.913           | 1.80<br>± 3.05          | 0.556           | 15.89<br>± 7.49         | 0.035*          | 0.00<br>± 0.60  | 0.995           | 193.23<br>± 909.50     | 0.832           |
| t0-t3<br>(0-15 months)  | -2.31<br>± 1.79                | 0.196           | 0.03<br>± 0.05        | 0.602           | -19.37<br>± 8.68      | 0.026*          | -3.67<br>± 7.41           | 0.620           | 2.44<br>± 2.78          | 0.380           | 7.78<br>± 7.98          | 0.331           | 0.83<br>± 0.61  | 0.173           | -978.62<br>± 810.64    | 0.228           |
| Group<br>(control)      | -0.69<br>± 1.03                | 0.507           | -0.04<br>± 0.04       | 0.321           | -9.43<br>± 5.35       | 0.079           | 0.07<br>± 5.51            | 0.990           | -0.02<br>± 1.88         | 0.992           | 3.12<br>± 4.66          | 0.502           | 0.11<br>± 0.26  | 0.661           | -557.02<br>± 743.91    | 0.454           |
| Time*group<br>(control) |                                |                 |                       |                 |                       |                 |                           |                 |                         |                 |                         |                 |                 |                 |                        |                 |
| t0-t1<br>(0-3 months)   | 0.19<br>± 1.14                 | 0.864           | -0.05<br>± 0.04       | 0.130           | 1.28<br>± 5.36        | 0.812           | -5.07<br>± 4.96           | 0.307           | 0.23<br>± 1.57          | 0.885           | -6.73<br>± 4.41         | 0.128           | 0.07<br>± 0.38  | 0.858           | -654.11<br>± 515.92    | 0.205           |
| t0-t2<br>(0-9 months)   | 0.94<br>± 1.19                 | 0.433           | -0.02<br>± 0.04       | 0.655           | 7.73<br>± 5.36        | 0.150           | -6.21<br>± 4.90           | 0.205           | -1.46<br>± 1.93         | 0.448           | -6.65<br>± 4.82         | 0.169           | 0.03<br>± 0.40  | 0.930           | -231.30<br>± 558.44    | 0.679           |
| t0-t3<br>(0-15 months)  | 0.58<br>± 1.24                 | 0.643           | 0.02<br>± 0.04        | 0.515           | 10.11<br>± 5.61       | 0.072           | -1.66<br>± 4.91           | 0.736           | -1.96<br>± 1.90         | 0.301           | -2.48<br>± 5.13         | 0.629           | -0.33<br>± 0.40 | 0.407           | 456.45<br>± 531.41     | 0.391           |

Data are presented as regression coefficient ± SE. Statistical significance ( $p < 0.05$ ) is indicated (\*). Intervention:  $n = 104$ , control:  $n = 85$ . ITT: intention-to-treat; HbA<sub>1c</sub>: glycated hemoglobin; HDL: high-density lipoprotein; LDL: low-density lipoprotein; FMD: flow-mediated dilatation.
